# Supplementary material
Source: PubMed Central journal article supplement (PMC9842389)
Supplement: mmc1.pdf [file mmc1.pdf]

## SUPPLEMENTARY MATERIAL

### Appendix A – Semi-structured interview guide

| <b>INTERVIEW GUIDE: REDI Pastors</b>                                                                                                                     |                                                                                                                                                                                          |
|----------------------------------------------------------------------------------------------------------------------------------------------------------|------------------------------------------------------------------------------------------------------------------------------------------------------------------------------------------|
| Date:<br>Assigned pseudonym:<br>Affiliated ICM regional base:                                                                                            | Translator: Y / N<br>Translator sex: M / F<br>Translator age:<br>Relation to participant:                                                                                                |
| <b>A. Demographic and contextual factors</b>                                                                                                             |                                                                                                                                                                                          |
| <b>General</b>                                                                                                                                           |                                                                                                                                                                                          |
| <b>*Could you tell me a bit about yourself to start? Where you are from, your occupation, etc.?</b>                                                      |                                                                                                                                                                                          |
| Community:<br>Province:<br>Ethnicity:<br>Language(s):<br>Education level completed:<br>Marital status: Sing / Mar / Div / Wid / Child<br>Household size: | Age:<br>Sex: M / F<br>Occupation:<br>Hometown:<br>Joined ICM:<br>Joined REDI:                                                                                                            |
| <b>Before COVID-19</b>                                                                                                                                   |                                                                                                                                                                                          |
| <b>*Could you tell me about how things were for you before COVID-19?</b>                                                                                 |                                                                                                                                                                                          |
| Questions                                                                                                                                                | Prompts                                                                                                                                                                                  |
| 1. Can you describe a typical day or week for you before COVID-19?                                                                                       | <i>Routine, religious activities, job, tasks, roles in the community, social networks, family</i>                                                                                        |
| 2. Can you describe your interactions with community members before COVID-19?                                                                            | <i>Relationships, religious activities, community-based activities, everyday socializing, cellphone / in-person</i>                                                                      |
| 3. Can you describe your role(s) and tasks in your community before COVID-19?                                                                            | <i>Pastor, religious activities, educate, ICM, jobs, community involvement, political</i>                                                                                                |
| 4. What motivates you to do what you do (for example, be a pastor, partner with ICM, other)?                                                             | <i>Why do you do what you do? Poverty, compassion, faith, values, personality, family, history</i>                                                                                       |
| 5. Why do you think what you do (pastor, partner with ICM, other) is important?                                                                          | <i>Poverty-alleviation, community well-being, religious</i>                                                                                                                              |
| 6. How did you become involved with ICM?                                                                                                                 | <i>Reasons for joining, religious background, social connection</i>                                                                                                                      |
| <b>During COVID-19</b>                                                                                                                                   |                                                                                                                                                                                          |
| <b>*Could you tell me a bit about COVID-19 in your area?</b>                                                                                             |                                                                                                                                                                                          |
| 1. What is the current level of quarantine in your area?                                                                                                 | <i>None / MGCQ / GCQ / ECQ / MECQ</i>                                                                                                                                                    |
| 2. Can you describe the COVID-19 measures in your area?                                                                                                  | <i>Movement of people, stay-at-home policy, gatherings, checkpoints, curfews, transportation, quarantine passes, education, work, physical distancing, masks, safety procedures, PPE</i> |

|                                                                       |                                                                                               |                                                                                                                                       |
|-----------------------------------------------------------------------|-----------------------------------------------------------------------------------------------|---------------------------------------------------------------------------------------------------------------------------------------|
| 3.                                                                    | Can you describe the effect of COVID-19 in your area?                                         | <i>Virus transmission, job loss, income loss, food insecurity, mental health, access to health and social services, access to PPE</i> |
| 4.                                                                    | Can you describe a typical day or week for you during COVID-19?                               | <i>Roles in the community, tasks, safety procedures, quarantine protocols</i>                                                         |
| 5.                                                                    | Can you describe your interactions with community members during COVID-19?                    | <i>Relationships, social distancing, gatherings, everyday socializing, cellphone / in-person</i>                                      |
| <b>B. Involvement in REDI Network</b>                                 |                                                                                               |                                                                                                                                       |
| <b>*Could you tell me about your involvement in the REDI Network?</b> |                                                                                               |                                                                                                                                       |
| <b>General</b>                                                        |                                                                                               |                                                                                                                                       |
| 1.                                                                    | How did you become involved in the REDI Network?                                              | <i>Reasons for joining, religious background, social connection</i>                                                                   |
| 2.                                                                    | What training did you receive when you joined the REDI Network?                               | <i>General, during COVID-19</i>                                                                                                       |
| 3.                                                                    | Can you describe your tasks in the REDI Network during COVID-19?                              | <i>Monitor food needs, report to ICM through EngageSpark, receive food, deliver food, ensure adequacy, monitor new needs</i>          |
| 4.                                                                    | How much time in a day / week do you spend doing tasks for REDI during COVID-19?              | <i>Number of hours / days per week, too much / too little time spent</i>                                                              |
| 5.                                                                    | How does REDI fit with your other tasks and responsibilities outside ICM during COVID-19?     | <i>Prioritize, busy, hard to find time, fits well</i>                                                                                 |
| <b>Concepts and practices of care</b>                                 |                                                                                               |                                                                                                                                       |
| 1.                                                                    | Do you think your tasks in REDI are necessary? Why or why not?                                | <i>Poverty-alleviation, food security, religious</i>                                                                                  |
| 2.                                                                    | Can you describe your interactions with ICM staff in REDI?                                    | <i>When, in-person / text message / call, available, responsive, helpful, positive / negative experience</i>                          |
| 3.                                                                    | Can you describe your interactions with other REDI Network members?                           | <i>When, reason, EngageSpark, in-person / text message / call, responsive, supportive, positive / negative experience</i>             |
| 4.                                                                    | Can you describe your interactions with community members when you do tasks for ICM and REDI? | <i>When, in-person / text message / call, monitor, support (emotional, spiritual, physical), relationships</i>                        |
| 5.                                                                    | Can you describe how you determine food aid requirements in your community?                   | <i>Observe, record, monitor, prioritize, organize, visit, communicate (call, text, in-person)</i>                                     |
| a.                                                                    | How do you decide which individuals and families need food aid?                               |                                                                                                                                       |
| b.                                                                    | How do you know how much food aid is needed?                                                  |                                                                                                                                       |
| c.                                                                    | How do you know if the food aid provided is enough?                                           |                                                                                                                                       |
| d.                                                                    | How do you know when individuals and families need more food?                                 |                                                                                                                                       |
| 6.                                                                    | Can you describe whether or how you follow pandemic guidelines?                               | <i>PPE, physical distance, sanitize, curfew, checkpoints, quarantine pass, self-isolation</i>                                         |
| a.                                                                    | Where do the guidelines come from?                                                            |                                                                                                                                       |
| b.                                                                    | When you receive food aid from ICM?                                                           |                                                                                                                                       |

|                                                                                                                                             |    |                                                                                                                                                                              |                                                                                                                                                                                                                                               |
|---------------------------------------------------------------------------------------------------------------------------------------------|----|------------------------------------------------------------------------------------------------------------------------------------------------------------------------------|-----------------------------------------------------------------------------------------------------------------------------------------------------------------------------------------------------------------------------------------------|
|                                                                                                                                             | c. | When you deliver food aid to community members?                                                                                                                              |                                                                                                                                                                                                                                               |
|                                                                                                                                             | d. | In your personal life?                                                                                                                                                       |                                                                                                                                                                                                                                               |
| 7.                                                                                                                                          |    | Can you describe how being in REDI during COVID-19 has impacted you personally?                                                                                              | <i>Physical / mental / spiritual well-being, emotions, anxiety, fatigue, isolated, movement, gathering, social support, time constraints, work, communication, food and essentials, PPE, pandemic protocols / precautions, self-isolation</i> |
|                                                                                                                                             | a. | What personal challenges have you faced?                                                                                                                                     |                                                                                                                                                                                                                                               |
|                                                                                                                                             | b. | How are you taking care of yourself?                                                                                                                                         |                                                                                                                                                                                                                                               |
|                                                                                                                                             | c. | How are you taking care of your family?                                                                                                                                      |                                                                                                                                                                                                                                               |
| 8.                                                                                                                                          |    | Can you describe whether or how your identity (for example, gender, age, marital status, occupation, location) influences your ability to do tasks for REDI during COVID-19? | <i>Why / why not, age, gender, ethnicity, language, marital status, level of education, employment, geographical location (community, province, region)</i>                                                                                   |
| <b>Perceived effectiveness</b>                                                                                                              |    |                                                                                                                                                                              |                                                                                                                                                                                                                                               |
| <b>*Could you share some of your opinions about how effective you think REDI is?</b>                                                        |    |                                                                                                                                                                              |                                                                                                                                                                                                                                               |
| 1.                                                                                                                                          |    | Do you think REDI is an effective way for ICM to address emergencies?                                                                                                        | <i>Why / why not</i>                                                                                                                                                                                                                          |
|                                                                                                                                             | a. | What do you think works well?                                                                                                                                                | <i>Communication, logistics, EngageSpark, organization, training, resources, support, relationships, time commitment</i>                                                                                                                      |
|                                                                                                                                             | b. | What do you think does not work well?                                                                                                                                        |                                                                                                                                                                                                                                               |
|                                                                                                                                             | c. | How could REDI improve?                                                                                                                                                      |                                                                                                                                                                                                                                               |
|                                                                                                                                             | d. | How could ICM support you better in REDI?                                                                                                                                    |                                                                                                                                                                                                                                               |
| 2.                                                                                                                                          |    | Do you plan to continue partnering with REDI in the future?                                                                                                                  | <i>Why / why not</i>                                                                                                                                                                                                                          |
| <b>Conclusion</b>                                                                                                                           |    |                                                                                                                                                                              |                                                                                                                                                                                                                                               |
| <b>*Thank you for sharing everything you have today. That is all of the questions I have for you, but before we finish our interview...</b> |    |                                                                                                                                                                              |                                                                                                                                                                                                                                               |
| 1.                                                                                                                                          |    | Is there anything else you would like to say about:                                                                                                                          |                                                                                                                                                                                                                                               |
|                                                                                                                                             | a. | Your experiences with ICM and REDI during COVID-19?                                                                                                                          |                                                                                                                                                                                                                                               |
|                                                                                                                                             | b. | Your opinions about ICM and REDI?                                                                                                                                            |                                                                                                                                                                                                                                               |
